# Supplementary material for: Nanonet force microscopy for measuring forces in single smooth muscle cells of the human aorta
Source: PubMed Central journal article supplement — Mol Biol Cell. 2017 Jul 7;28(14):1894–900. doi: 10.1091/mbc.E17-01-0053 (PMC5541840; doi:10.1091/mbc.e17-01-0053), 2017-07-07
Supplement: supp_E17-01-0053v1_CombinedSupMats.pdf [file supp_E17-01-0053v1_CombinedSupMats.pdf]

# Supplemental Materials

*Molecular Biology of the Cell*

Hall et al.
